# Supplementary material
Source: Springer Nature journal article supplement (https://www.springermedizin.de/resource/supplementary/12986_2012_536_MOESM1_ESM.pdf/25654980)

## Search strategy

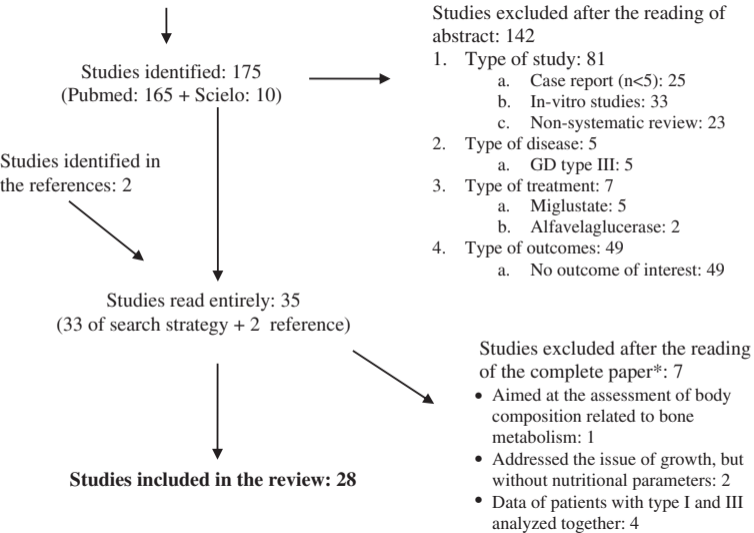

Supplement: MOESM1 [file 25654980]
